# Supplementary material for: Interaction of copper with dinitrogen tetroxide in 1-butyl-3-methylimidazolium-based ionic liquids
Source: Royal Society of Chemistry journal article supplement (doi:10.1039/c6dt04526j), 2017-01-01
Supplement: c6dt04526j3.pdf [file c6dt04526j3.pdf]

## Supplementary Data

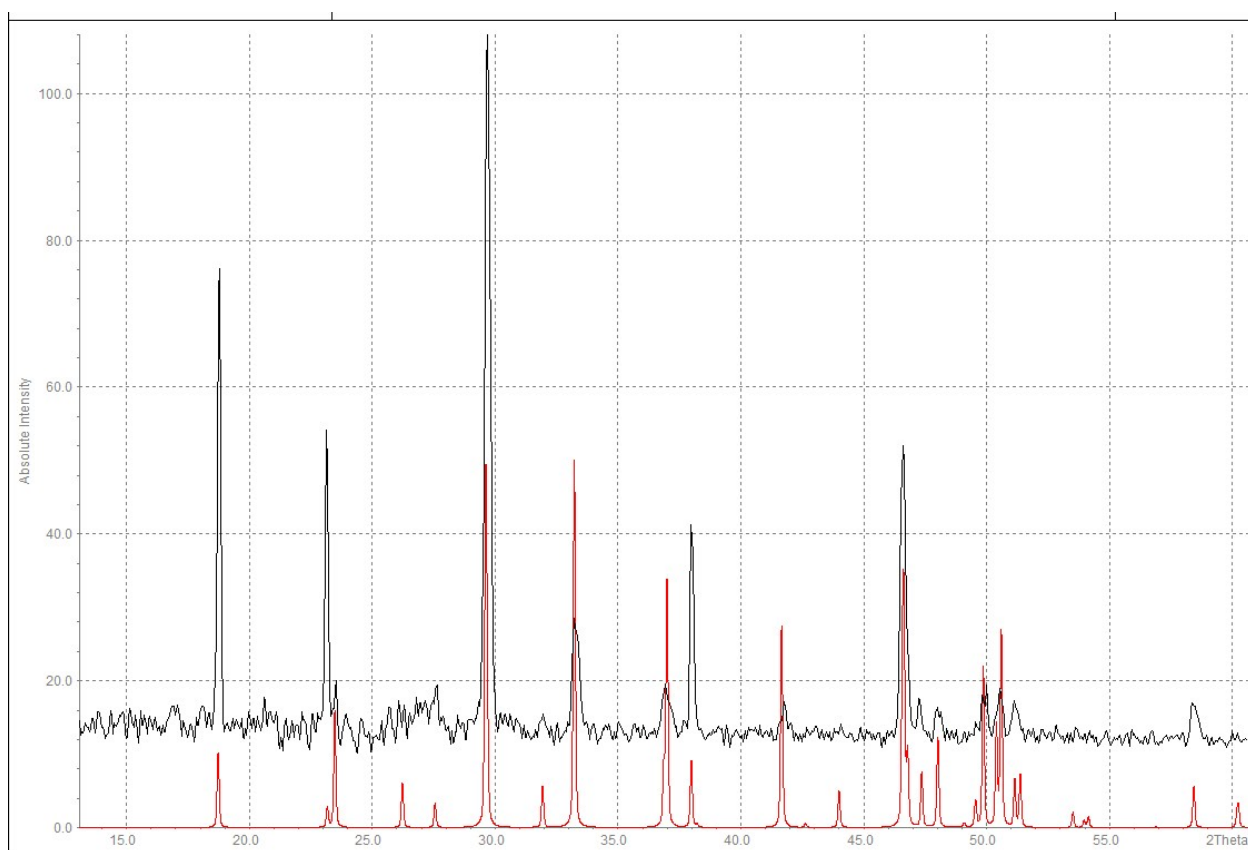

Diffraction pattern of a polycrystalline sample NO[BF<sub>4</sub>] (shown in black) in comparison with the theoretical curve (red).
